# Supplementary material
Source: publisher site journal article supplement (https://static.cambridge.org/content/id/urn:cambridge.org:id:article:S2040174420000100/resource/name/S2040174420000100supp001.docx)
Supplement: Supplementary file 1 [file S2040174420000100supp001.docx]

**Supplementary Table**

ICD-9 codes for morbidity related diagnoses used.

| **Groups** | **Diag. Code** | **Diagnosis Description** |
| --- | --- | --- |
| **Hematological morbidities** | | |
| **Immunodeficiency disorders** | 27941 | AUTOIMMUNE LYMPHOPROLIFERATIVE SYNDROME |
| 2792 | COMBINED IMMUNITY DEFICIENCY |
| 27906 | COMMON VARIABLE IMMUNODEFICIENCY |
| 27904 | CONGENITAL HYPOGAMMAGLOBULINEMIA |
| 2790 | DEFICIENCY OF HUMORAL IMMUNITY |
| 27911 | DIGEORGE'S SYNDROME |
| 27900 | HYPOGAMMAGLOBULINEMIA, UNSPECIFIED |
| 27905 | IMMUNODEFICIENCY WITH INCREASED IGM |
| 27909 | OTHER DEFICIENCY OF HUMORAL IMMUNITY |
| 27903 | OTHER SELECTIVE IMMUNOGLOBULIN DEFICIENCIES |
| 2798 | OTHER SPECIFIED DISORDERS INVOLVING THE IMMUNE MECHANISM |
| 27901 | SELECTIVE IGA IMMUNODEFICIENCY |
| 2799 | UNSPECIFIED DISORDER OF IMMUNE MECHANISM |
| 2793 | UNSPECIFIED IMMUNITY DEFICIENCY |
| 27912 | WISKOTT-ALDRICH SYNDROME |
| **Hereditary anemias** | 2822 | ANEMIAS, DISORDERS OF GLUTATHIONE METABOLISM (G-6-P-D-) |
| 2822 1 | G-6-PD DEFICIENCY |
| 2821 | HEREDITARY ELLIPTOCYTOSIS |
| 2820 | HEREDITARY SPHEROCYTOSIS |
| 2897 | METHEMOGLOBINEMIA |
| 2827 | OTHER HEMOGLOBINOPATHIES |
| 2823 | OTHER HEMOLYTIC ANEMIAS DUE TO ENZYME DEFICIENCY |
| 28249 | OTHER THALASSEMIA |
| 28260 | SICKLE-CELL DISEASE, UNSPECIFIED |
| 28242 | SICKLE-CELL THALASSEMIA WITH CRISIS |
| 28241 | SICKLE-CELL THALASSEMIA WITHOUT CRISIS |
| 2825 | SICKLE-CELL TRAIT |
| 282491 | THALASSEMIA INTERMEDIA |
| 282490 | THALASSEMIA MAJOR |
| 2824 | THALASSEMIAS |
| **Acquired anemias** | 2839 | ACQUIRED HEMOLYTIC ANEMIA, UNSPECIFIED |
| 2849 | APLASTIC ANEMIA, UNSPECIFIED |
| 2830 | AUTOIMMUNE HEMOLYTIC ANEMIAS |
| 2840 | CONSTITUTIONAL APLASTIC ANEMIA |
| 28401 | CONSTITUTIONAL RED BLOOD CELL APLASIA |
| 28311 | HEMOLYTIC-UREMIC SYNDROME |
| 2829 | HEREDITARY HEMOLYTIC ANEMIA, UNSPECIFIED |
| 2831 | NON-AUTOIMMUNE HEMOLYTIC ANEMIAS |
| 28409 | OTHER CONSTITUTIONAL APLASTIC ANEMIA |
| 28319 | OTHER NON-AUTOIMMUNE HEMOYTIC ANEMIAS |
| 2848 | OTHER SPECIFIED APLASTIC ANEMIAS |
| 28489 | OTHER SPECIFIED APLASTIC ANEMIAS |
| 28481 | RED CELL APLASIA (ACQUIRED)(ADULT)(WITH THYMOMA) |
| 2850 | SIDEROBLASTIC ANEMIA |
| **Cytopenia NOS** | 2851 | ACUTE POSTHEMORRHAGIC ANEMIA |
| 2852 | ANEMIA IN CHRONIC ILLNESS |
| 28521 | ANEMIA IN CHRONIC KIDNEY DISEASE |
| 28529 | ANEMIA OF OTHER CHRONIC DISEASE |
| **Coagulation disorders** | 2867 | ACQUIRED COAGULATION FACTOR DEFICIENCY |
| 286 | COAGULATION DEFECTS |
| 28733 | CONGENITAL AND HEREDITARY THROMBOCYTOPENIC PURPURA |
| 2863 | CONGENITAL DEFICIENCY OF OTHER CLOTTING FACTORS |
| 2861 | CONGENITAL FACTOR IX DISORDER |
| 2860 | CONGENITAL FACTOR VIII DISORDER |
| 2862 | CONGENITAL FACTOR XI DEFICIENCY |
| 2866 | DEFIBRINATION SYNDROME |
| 28950 | DISEASE OF SPLEEN, UNSPECIFIED |
| 23871 | ESSENTIAL THROMBOCYTHEMIA |
| 28732 | EVANS' SYNDROME |
| 2894 | HYPERSPLENISM |
| 28731 | IMMUNE THROMBOCYTOPENIC PURPURA |
| 2869 | OTHER AND UNSPECIFIED COAGULATION DEFECTS |
| 28959 | OTHER DISEASES OF SPLEEN |
| 28981 | PRIMARY HYPERCOAGULABLE STATE |
| 2873 | PRIMARY THROMBOCYTOPENIA |
| 28730 | PRIMARY THROMBOCYTOPENIA, UNSPECIFIED |
| 2871 | QUALITATIVE PLATELET DEFECTS |
| 2874 | SECONDARY THROMBOCYTOPENIA |
| 2875 | THROMBOCYTOPENIA, UNSPECIFIED |
| 2879 | UNSPECIFIED HEMORRHAGIC CONDITIONS |
| 2864 | VON WILLEBRAND'S DISEASE |
| **White blood cell disorders** | 28801 | CONGENITAL NEUTROPENIA |
| 28802 | CYCLIC NEUTROPENIA |
| 288 | DISEASES OF WHITE BLOOD CELLS |
| 28803 | DRUG INDUCED NEUTROPENIA |
| 2881 | FUNCTIONAL DISORDERS OF POLYMORPHONUCLEAR NEUTROPHILS |
| 2882 | GENETIC ANOMALIES OF LEUKOCYTES |
| 2884 | HEMOPHAGOCYTIC SYNDROMES |
| 2889 | UNSPECIFIED DISEASE OF WHITE BLOOD CELLS |
| **Other** | 23875 | MYELODYSPLASTIC SYNDROME, UNSPECIDIED |
| 2842 | MYELOPHTHISIS |
| 2384 | POLYCYTHEMIA VERA |
| 23877 | POST-TRANSPLANT LYMPHOPROLIFERATIVE DISORDER (PTLD) |
| **Cardiologic morbidities** | | |
| **Structural Valvular disease** | 3940 | MITRAL STENOSIS |
|  | 3949 | OTHER AND UNSPECIFIED MITRAL VALVE DISEASES |
| 3961 | MITRAL VALVE STENOSIS AND AORTIC VALVE INSUFFICIENCY |
| 3963 | MITRAL VALVE INSUFFICIENCY AND AORTIC VALVE INSUFFICIENCY |
| 3968 | MULTIPLE INVOLVEMENT OF MITRAL AND AORTIC VALVES |
| 3970 | DISEASES OF TRICUSPID VALVE |
| 4240 | MITRAL VALVE DISORDERS |
| 4241 | AORTIC VALVE DISORDERS |
| 4242 | TRICUSPID VALVE DISORDERS, SPECIFIED AS NONRHEUMATIC |
| 4243 | PULMONARY VALVE DISORDERS |
| **Hypertension** | 4019 | UNSPECIFIED ESSENTIAL HYPERTENSION |
|  | 4372 | HYPERTENSIVE ENCEPHALOPATHY |
| 40390 | UNSP. HYPERTENSIVE KIDNEY DIS. WITH CHRONIC KIDNEY DISEASE STAGE I THROUGH STAGE IV, OR UNSPECIFIED |
| 40391 | UNSP. HYPERTENSIVE KIDNEY DIS. WITH CHRONIC KIDNEY DISEASE |
| 40391 | UNSP. HYPERTENSIVE KIDNEY DIS. WITH CHRONIC KIDNEY DISEASE STAGE V OR END STAGE RENAL DISEASE |
| 40391 | UNSP. HYPERTENSIVE RENAL DIS.+ RENAL FAILURE |
| 40591 | UNSPECIFIED RENOVASCULAR HYPERTENSION |
| **Arrhythmia** | 4260 | ATRIOVENTRICULAR BLOCK, COMPLETE |
| 4263 | OTHER LEFT BUNDLE BRANCH BLOCK |
| 4264 | RIGHT BUNDLE BRANCH BLOCK |
| 4267 | ANOMALOUS ATRIOVENTRICULAR EXCITATION |
| 4270 | PAROXYSMAL SUPRAVENTRICULAR TACHYCARDIA |
| 4271 | PAROXYSMAL VENTRICULAR TACHYCARDIA |
| 4272 | PAROXYSMAL TACHYCARDIA, UNSPECIFIED |
| 4273 | ATRIAL FIBRILLATION AND FLUTTER |
| 4275 | CARDIAC ARREST |
| 4279 | CARDIAC DYSRHYTHMIA, UNSPECIFIED |
| 7850 | TACHYCARDIA, UNSPECIFIED |
| 7851 | PALPITATIONS |
| 42611 | FIRST DEGREE ATRIOVENTRICULAR BLOCK |
| 42612 | MOBITZ (TYPE) II ATRIOVENTRICULAR BLOCK |
| 42613 | OTHER SECOND DEGREE ATRIOVENTRICULAR BLOCK |
| 42682 | LONG QT SYNDROME |
| 42689 | OTHER SPECIFIED CONDUCTION DISORDERS |
| 42731 | ATRIAL FIBRILLATION |
| 42732 | ATRIAL FLUTTER |
| 42741 | VENTRICULAR FIBRILLATION |
| 42760 | PREMATURE BEATS, UNSPECIFIED |
| 42761 | SUPRAVENTRICULAR PREMATURE BEATS |
| 42769 | OTHER PREMATURE BEATS |
| 42789 | OTHER SPECIFIED CARDIAC DYSRHYTHMIAS |
| 427811 | SINUS BRADYCARDIA |
| 4267 1 | WOLFF-PARKINSON-WHITE SYNDROME |
| **Rheumatic fever** | 390 | RHEUMATIC FEVER WITHOUT MENTION OF HEART INVOLVEMENT |
| 3911 | ACUTE RHEUMATIC ENDOCARDITIS |
| 3918 | OTHER ACUTE RHEUMATIC HEART DISEASE |
| 3919 | ACUTE RHEUMATIC HEART DISEASE, UNSPECIFIED |
| 3920 | RHEUMATIC CHOREA WITH HEART INVOLVEMENT |
| 3929 | RHEUMATIC CHOREA WITHOUT MENTION OF HEART INVOLVEMENT |
| 3941 | RHEUMATIC MITRAL INSUFFICIENCY |
| 3951 | RHEUMATIC AORTIC INSUFFICIENCY |
| 39890 | RHEUMATIC HEART DISEASE, UNSPECIFIED |
| **Ischemic heart disease** | 414 | OTHER FORMS OF CHRONIC ISCHEMIC HEART DISEASE |
| 4100 | ACUTE MYOCARDIAL INFARCTION OF ANTEROLATERAL WALL |
| 4109 | ACUTE MYOCARDIAL INFARCTION OF UNSPECIFIED SITE |
| 4111 | INTERMEDIATE CORONARY SYNDROME |
| 4149 | CHRONIC ISCHEMIC HEART DISEASE, UNSPECIFIED |
| 4292 | CARDIOVASCULAR DISEASE, UNSPECIFIED |
| 4295 | RUPTURE OF CHORDAE TENDINEAE |
| 41000 | AC. M.I. ANTEROLATERAL, EPISODE OF CARE UNSP. |
| 41011 | AC. M.I. OTHER ANTERIOR, INITIAL EPISODE OF CARE |
| 41071 | AC. M.I. SUBENDOCARDIAL, INITIAL EPISODE OF CARE |
| 41091 | AC. M.I. UNSP. SITE, INITIAL EPISODE OF CARE |
| 41410 | ANEURYSM OF HEART (WALL) |
| 42979 | OTHER, MURAL THROMBUS (ATR.)(VENT.)ACQUIRED,FOLLOWING M.I. |
| **Pulmonary heart disease**  **Peri-myo-endocarditis** | 4160 | PRIMARY PULMONARY HYPERTENSION |
| 4168 | OTHER CHRONIC PULMONARY HEART DISEASES |
| 4169 | CHRONIC PULMONARY HEART DISEASE, UNSPECIFIED |
| 4171 | ANEURYSM OF PULMONARY ARTERY |
| 41519 | OTHER PULMONARY EMBOLISM & INFARCTION |
| 4230 | HEMOPERICARDIUM |
| 4232 | CONSTRICTIVE PERICARDITIS |
| 4233 | CARDIAC TAMPONADE |
| 4238 | OTHER SPECIFIED DISEASES OF PERICARDIUM |
| 4239 | UNSPECIFIED DISEASE OF PERICARDIUM |
| 4251 | HYPERTROPHIC OBSTRUCTIVE CARDIOMYOPATHY |
| 4252 | OBSCURE CARDIOMYOPATHY OF AFRICA |
| 4253 | ENDOCARDIAL FIBROELASTOSIS |
| 4254 | OTHER PRIMARY CARDIOMYOPATHIES |
| 4257 | NUTRITIONAL AND METABOLIC CARDIOMYOPATHY |
| 4259 | SECONDARY CARDIOMYOPATHY, UNSPECIFIED |
| 4289 | HEART FAILURE, UNSPECIFIED |
| 42490 | ENDOCARDITIS, VALVE UNSPECIFIED, UNSPECIFIED CAUSE |
| **Heart failure** | 4280 | CONGESTIVE HEART FAILURE |
| 4280 | CONGESTIVE HEART FAILURE, UNSPECIFIED |
| 4281 | LEFT HEART FAILURE |
| 42841 | ACUTE COMBINED SYSTOLIC AND DIASTOLIC HEART FAILURE |
| **Heart disease NOS** | 4299 | HEART DISEASE, UNSPECIFIED |
| 9971 | CARDIAC COMPLICATIONS, NOT ELSEWHERE CLASSIFIED |
| 42989 | OTHER ILL-DEFINED HEART DISEASES |
| **Other** | 7852 | FUNCTIONAL AND UNDIAGNOSED CARDIAC MURMURS |
| 7852 | UNDIAGNOSED CARDIAC MURMURS,(HEART MURMUR NOS) |
| 7859 | OTHER SYMPTOMS INVOLVING CARDIOVASCULAR SYSTEM |
| 7852 1 | SYSTOLIC MURMUR |
| **Respiratory morbidities** | | |
| **Asthma** | 496 | CHRONIC AIRWAY OBSTRUCTION, NOT ELSEWHERE CLASSIFIED |
|  | 493 | ASTHMA |
| 4939 | ASTHMA, UNSPECIFIED |
| 5060 | BRONCHITIS AND PNEUMONITIS DUE TO FUMES AND VAPORS |
| 49300 | EXTRINSIC ASTHMA, UNSPECIFIED |
| 49320 | CHR. OBSTRUCTIVE ASTHMA, UNSPECIFIED |
| 49321 | CHR. OSBTRUCTIVE ASTHMA WITH STATUS ASTHMATICUS |
| 49390 | ASTHMA,UNSPECIFIED |
| 49390 | ASTHMA,UNSPECIFIED TYPE,WITHOUT MENTION OF STATUS ASTHMATICUS |
| 49390 | ASTHMA,UNSPECIFIED TYPE,WITHOUT MENTION OF STATUS ASTHMATICUS OR ACUTE EXACERBATION OR UNSPECIFIED |
| 49391 | ASTHMA, UNSPECIFIED TYPE, WITH STATUS ASTHMATICUS |
| 49392 | UNSPECIFIED ASTHMA WITH (ACUTE) EXACERBATION |
| 49392 | UNSPECIFIED ASTHMA WITH ACUTE EXACERBATION |
| 51911 | ACUTE BRONCHOSPASM |
| **Structural-emphysema** | 4920 | EMPHYSEMATOUS BLEB |
|  | 5181 | INTERSTITIAL EMPHYSEMA |
| V4576 | ACQUIRED ABSENCE OF ORGAN, LUNG |
| **Bronchiectasis, fibrosis, siderosis** | 494 | BRONCHIECTASIS |
|  | 515 | POSTINFLAMMATORY PULMONARY FIBROSIS |
| 4940 | BRONCHIECTESIS WITHOUT ACUTE EXACERBATION |
| 4941 | BRONCHIECTASIS WITH ACUTE EXACERBATION |
| 4959 | UNSPECIFIED ALLERGIC ALVEOLITIS AND PNEUMONITIS |
| 5160 | PULMONARY ALVEOLAR PROTEINOSIS |
| 5161 | IDIOPATHIC PULMONARY HEMOSIDEROSIS |
| 5183 | PULMONARY EOSINOPHILIA |
| **Pneumonitis** | 5070 | PNEUMONITIS DUE TO INHALATION (FOOD,VOMITUS,OR N.O.S.) |
|  | 5070 | PNEUMONITIS DUE TO INHALATION OF FOOD OR VOMITUS |
| 5071 | PNEUMONITIS DUE TO INHALATION OF OILS AND ESSENCES |
| 5078 | PNEUMONITIS DUE TO OTHER SOLIDS AND LIQUIDS |
| 5168 | OTHER SPECIFIED ALVEOLAR AND PARIETOALVEOLAR PNEUMONOPATHIES |
| 5192 | MEDIASTINITIS |
| 5193 | OTHER DISEASES OF MEDIASTINUM, NOT ELSEWHERE CLASSIFIED |
| 5194 | DISORDERS OF DIAPHRAGM |
| **Pleural** | 5110 | PLEURISY WITHOUT MENTION OF EFFUSION OR CURRENT TUBERCULOSIS |
|  | 5118 | OTHER SPECIFIED FORMS OF PLEURAL EFFUSION, EXCEPT TUBERCULOUS |
| 5119 | UNSPECIFIED PLEURAL EFFUSION |
| 5120 | SPONTANEOUS TENSION PNEUMOTHORAX |
| 5128 | OTHER SPONTANEOUS PNEUMOTHORAX |
| 51181 | MALIGNANT PLEURAL EFFUSION |
| 51189 | OTHER SPECIFIED FORMS OF EFFUSION, EXCEPT TUBERCULOUS |
| **OSA** | 7991 | RESPIRATORY FAILURE |
|  | 32723 | OBSTRUCTIVE SLEEP APNEA (ADULT)(PEDIATRIC) |
| 78051 | INSOMNIA WITH SLEEP APNEA |
| 78051 | INSOMNIA WITH SLEEP APNEA, UNSPECIFIED |
| 78057 | OTHER & UNSPECIFIED SLEEP APNEA |
| 78057 | OTHER AND UNSPECIFIED SLEEP APNEA |
| 78057 | UNSPECIFIED SLEEP APNEA |
| **Others** | 7990 | ASPHYXIA |
|  | 7990 | ASPHYXIA AND HYPOXEMIA |
| 79901 | ASPHYXIA |
| 514 | PULMONARY CONGESTION AND HYPOSTASIS |
| 518 | OTHER DISEASES OF LUNG |
| 786 | SYMPTOMS INVOLVING RESPIRATORY SYSTEM & OTHER CHEST SYMPTOMS |
| 4928 | OTHER EMPHYSEMA |
| 5178 | LUNG INVOLVEMENT IN OTHER DISEASES CLASSIFIED ELSEWHERE |
| 5180 | PULMONARY COLLAPSE |
| 5185 | PULMONARY INSUFFICIENCY FOLLOWING TRAUMA AND SURGERY |
| 5186 | ALLERGIC BRONCHOPULMONARY ASPERGILLOSIS |
| 5191 | OTHER DISEASES OF TRACHEA AND BRONCHUS,NOT ELSEWHERE CLASSIF. |
| 5198 | OTHER DISEASES OF RESPIRATORY SYSTEM, NOT ELSEWHERE CLASSIFIED |
| 5199 | UNSPECIFIED DISEASE OF RESPIRATORY SYSTEM |
| 9973 | RESPIRATORY COMPLICATIONS, NOT ELSEWHERE CLASSIFIED |
| 51883 | CHRONIC RESPIRATORY FAILURE |
| 51900 | TRACHEOSTOMY COMPLICATION, UNSP. |
| 51909 | OTHER TRACHEOSTOMY COMPLICATIONS |
| 51919 | OTHER DISEASES OF TRACHEA BRONCHUS |
| 78607 | WHEEZING |
| 78609 | OTHER DYSPNEA AND RESPIRATORY ABNORMALITY |
| 99739 | OTHER RESPIRATORY COMPLICATIONS |
| **Neurological morbidities** | | |
| **Autistic spectrum disorders** | 2990 | AUTISTIC DISORDER |
| 2990 | INFANTILE AUTISM |
| 29900 | AUTISTIC DISORDER, CURRENT OR ACTIVE STATE |
| 29901 | AUTISTIC DISORDER, RESIDUAL STATE |
| 29910 | CHILDHOOD DISINTEGRATIVE DISORDER, CURRENT OR ACTIVE STATE |
| 2998 | OTHER SPECIFIED PERVASIVE DEVELOPMENTAL DISORDERS |
| 29981 | OTHER SPECIFIED PERVASIVE DEVELOPMENTAL DISORDERS, RESIDULA STATE |
| 29990 | UNSPECIF.PERVASIVE DEVELOPMENTAL DISORDER,CURRENT OR ACTIVE STATE |
| **Eating disorders** | 3071 | ANOREXIA NERVOSA |
| 3075 | OTHER AND UNSPECIFIED DISORDERS OF EATING |
| 30750 | EATING DISORDER, UNSPECIFIED |
| 30751 | BULIMIA NERVOSA |
| 30753 | RUMINATION DISORDER |
| 30759 | OTHER DISORDERS OF EATING |
| V691 | INAPPROPRIATE DIET & EATING HABITS |
| **Sleeping disorders** | 3073 | STEREOTYPIC MOVEMENT DISORDER |
| 30746 | SLEEP AROUSAL DISORDER |
| 30746 | SOMNAMBULISM OR NIGHT TERRORS |
|  | 30747 | OTHER DYSFUNCTIONS OF SLEEP STAGES OR AROUSAL FROM SLEEP |
| 32727 | CENTRAL SLEEP APNEA IN CONDITIONS CLASSIFIED ELSEWHERE |
| 32730 | CIRCADIAN RHYTHM SLEEP DISORDER, UNSPECIFIED |
| 32732 | CIRCADIAN RHYTHM SLEEP DISORDER, ADVANCED SLEEP PHASE TYPE |
| 34700 | NARCOLEPSY WITHOUT CATAPLEXY |
| 34701 | NARCOLEPSY WITH CATAPLEXY |
| 7805 | SLEEP DISTURBANCES |
| 78050 | UNSPECIFIED SLEEP DISTURBANCE |
| 78051 | INSOMNIA WITH SLEEP APNEA |
| 78051 | INSOMNIA WITH SLEEP APNEA, UNSPECIFIED |
| 78052 | INSOMNIA, UNSPECIFIED |
| 78052 | OTHER INSOMNIA |
| 78054 | HYPERSOMNIA, UNSPECIFIED |
| 78056 | DYSFUNCTIONS ASSOCIATED WITH SLEEP STAGES OR AROUSAL FROM SLEEP |
| 78059 | OTHER SLEEP DISTURBANCES |
| V694 | LACK OF ADEQUATE SLEEP |
| **Movement disorders** | 3331 | ESSENTIAL AND OTHER SPECIFIED FORMS OF TREMOR |
| 3332 | MYOCLONUS |
| 3335 | OTHER CHOREAS |
| 3336 | GENETIC TORSION DYSTONIA |
| 3336 | IDIOPATHIC TORSION DYSTONIA |
| 33390 | UNSP.EXTRAPYRAMIDAL DISEASE + ABNORMAL MOVEMENT DISORDER |
| 33399 | OTHER EXTRAPYRAMIDAL DISEASES AND ABNORMAL MOVEMENT DISORDERS |
| 3343 | OTHER CEREBELLAR ATAXIA |
| **Epilepsy** | 3450 | GENERALIZED NONCONVULSIVE EPILEPSY |
| 34500 | GENERALIZED NONCONVULSIVE EPILEPSY WITHOUT INTRACTABLE EPILEPSY |
| 34501 | GENERALIZED NONCONVULSIVE EPILEPSY WITH INTRACTABLE EPILEPSY |
| 34510 | GENERALIZED CONVULSIVE EPILEPSY WITHOUT INTRACTABLE EPILEPSY |
| 34511 | GENERALIZED CONVULSIVE EPILEPSY WITH INTRACTABLE EPILEPSY |
| 3452 | PETIT MAL STATUS, EPILEPTIC |
| 3453 | GRAND MAL STATUS, EPILEPTIC |
| 34540 | PARTIAL EPILEPSY+IMPAIRMENT OF CONSCIOUSNESS WITHOUT INTRACTABLE EPILEPSY |
| 3455 | PARTIAL EPILEPSY, WITHOUT IMPAIRMENT OF CONSCIOUSNESS |
| 34550 | PARTIAL EPILEPSY WITHOUT IMPAIRMENT OF CONSCIOUSNESS WITHOUT INTR ACTABEL EPILEPSY |
| 3456 | INFANTILE SPASMS |
| 34560 | INFANTILE SPASMS WITHOUT INTRACTABLE EPILEPSY |
| 3459 | EPILEPSY, UNSPECIFIED |
| 34590 | EPILEPSY, NUSP. WITHOUT INTRACTABEL EPILEPSY |
| 34590 | EPILEPSY, UNSP. WITHOUT INTRACTABLE EPILEPSY |
| 34591 | EPILEPSY UNSP. WITH INTRACTABLE EPILEPSY |
| 78039 | OTHER CONVULSIONS |
| 7810 | ABNORMAL INVOLUNTARY MOVEMENTS |
| 7812 | ABNORMALITY OF GAIT |
| 7813 | LACK OF COORDINATION |
| **Cerebral palsy** | 3341 | HEREDITARY SPASTIC PARAPLEGIA |
| 3421 | SPASTIC HEMIPLEGIA |
| 34210 | SPASTIC HEMIPLEGIA AFFECTING UNSP. SIDE |
| 3429 | HEMIPLEGIA, UNSPECIFIED |
| 34290 | HEMIPLEGIA, UNSP., AFFECTING UNSP. SIDE |
| 34291 | HEMIPLEGIA, UNSP., AFFECTING DOMINANT SIDE |
| 34292 | HEMIPLEGIA, UNSP., AFFECTING NONDOMINANT SIDE |
| 3430 | CONGENITAL DIPLEGIA |
| 3431 | CONGENITAL HEMIPLEGIA |
| 3432 | CONGENITAL QUADRIPLEGIA |
| 3439 | INFANTILE CEREBRAL PALSY, UNSPECIFIED |
| 34400 | QUADRIPLEGIA, UNSPECIFIED |
| 3441 | PARAPLEGIA |
| 3442 | DIPLEGIA OF UPPER LIMBS |
| 34430 | MONOPLEGIA OF LOWER LIMB, AFFECTING UNSP. SIDE |
| 34440 | MONOPLEGIA OF UPPER LIMB, AFFECTING UNSP. SIDE |
| 34489 | OTHER SPECIFIED PARALYTIC SYNDROME |
| 3449 | PARALYSIS, UNSPECIFIED |
| 3481 | ANOXIC BRAIN DAMAGE |
| 3526 | MULTIPLE CRANIAL NERVE PALSIES |
| 43811 | APHASIA |
| 43820 | HEMIPLEGIA AFFECTING UNSP. SIDE |
| 7814 | TRANSIENT PARALYSIS OF LIMB |
| **Psychiatric disorders** | 2930 | ACUTE DELIRIUM |
| 2930 | DELIRIUM DUE TO CONDITIONS CLASSIFIED ELSEWHERE |
| 29384 | ANXIETY DISORDER IN CONDITIONS CLASSIFIED ELSEWHERE |
| 2940 | AMNESTIC DISORDER IN CONDITIONS CLASSIFIED ELSEWHERE |
| 2949 | UNSPECIFIED PERSISTENT MENTAL DISORDERS DUE TO COND.CLASS.ELSEWH. |
| 29530 | PARANOID TYPE SCHIZOPHRENIA, UNSPECIFIED STATE |
| 29570 | SCHIZOAFFECTIVE DISORDER SCHIZOPHRENIA, UNSPECIFIED STATE |
| 29580 | OTHER SPECIFIED TYPES OF SCHIZOPHRENIA, UNSPECIFIED STATE |
| 29590 | UNSPECIFIED TYPE SCHIZOPHRENIA, UNSPECIFIED STATE |
| 29600 | BIPOLAR I DISORDER, SINGLE MANIC EPISODE, UNSPECIFIED DEGREE |
| 29620 | MAJOR DEPRESSIVE AFFECTIVE DISORDER,SINGLE EPISODE,UNSP.DEGREE |
| 29680 | BIPOLAR DISORDER, UNSPECIFIED |
| 29690 | UNSPECIFIED EPISODIC MOOD DISORDER |
| 29699 | OTHER SPECIFIED AFFECTIVE PSYCHOSES |
| 2971 | DELUSIONAL DISORDER |
| 2979 | UNSPECIFIED PARANOID STATE |
| 2981 | EXCITATIVE TYPE PSYCHOSIS |
| 2983 | ACUTE PARANOID REACTION |
| 2989 | UNSPECIFIED PSYCHOSIS |
| 30000 | ANXIETY STATE, UNSPECIFIED |
| 30001 | PANIC DISORDER WITHOUT AGORAPHOBIA |
| 30009 | OTHER ANXIETY STATES |
| 30010 | HYSTERIA, UNSPECIFIED |
| 30011 | CONVERSION DISORDER |
| 30029 | OTHER ISOLATED OR SIMPLE PHOBIAS |
| 3003 | OBSESSIVE-COMPULSIVE DISORDERS |
| 3004 | DYSTHYMIC DISORDER |
| 3004 | NEUROTIC DEPRESSION |
| 3009 | UNSPECIFIED NONPSYCHOTIC MENTAL DISORDER |
| 30183 | BORDERLINE PERSONALITY |
| 30183 | BORDERLINE PERSONALITY DISORDER |
| 3019 | UNSPECIFIED PERSONALITY DISORDER |
| 3026 | DISORDERS OF PSYCHOSEXUAL IDENTITY |
| 30302 | AC.ALCOHOLIC INTOXIC.IN ALCOHOLISM,EPISODIC DRINKING BEHAVIOR |
| 30400 | OPIOID TYPE DEPENDENCE, UNSPECIFIED USE |
| 30430 | CANNABIS DEPENDENCE, UNSPECIFIED USE |
| 30432 | CANNABIS DEPENDENCE, EPISODIC USE |
| 30500 | ALCOHOL ABUSE, UNSPECIFIED DRINKING BEHAVIOR |
| 30501 | ALCOHOL ABUSE, CONTINUOUS DRINKING BEHAVIOR |
| 30502 | ALCOHOL ABUSE, EPISODIC DRINKING BEHAVIOR |
| 3051 | TOBACCO USE DISORDER (TOBACCO DEPENDENCE) |
| 30591 | OTHER, MIXED, OR UNSPECIFIED DRUG ABUSE, CONTINUOUS USE |
| 3061 | RESPIRATORY MALFUNCTION ARISING FROM MENTAL FACTORS |
| 3062 | CARDIOVASCULAR MALFUNCTION ARISING FROM MENTAL FACTORS |
| 3068 | OTHER SPECIFIED PSYCHOPHYSIOLOGICAL MALFUNCTION |
| 3069 | UNSPECIFIED PSYCHOPHYSIOLOGICAL MALFUNCTION |
| 3070 | ADULT ONSET FLUENCY DISORDER |
| 3070 | STAMMERING AND STUTTERING |
| 3070 | STUTTERING |
| 30720 | TIC DISORDER, UNSPECIFIED |
| 30722 | CHRONIC MOTOR OR VOCAL TIC DISORDER |
| 30723 | TOURETTE'S DISORDER |
| 30752 | PICA |
| 3080 | PREDOMINANT DISTURBANCE OF EMOTIONS |
| 3089 | UNSPECIFIED ACUTE REACTION TO STRESS |
| 309 | ADJUSTMENT REACTION |
| 3090 | ADJUSTMENT DISORDER WITH DEPRESSED MOOD |
| 30924 | ADJUSTMENT DISORDER WITH ANXIETY |
| 3094 | ADJUSTMENT DISOR.WITH MIXED DISTURB.OF EMOTIONS AND CONDUCT |
| 30981 | POSTTRAUMATIC STRESS DISORDER |
| 3099 | UNSPECIFIED ADJUSTMENT REACTION |
| 311 | DEPRESSIVE DISORDER, NOT ELSEWHERE CLASSIFIED |
| 31210 | UNDERSOCIALIZED CONDUCT DISORDER,UNAGGRESSIVE TYPE,UNSPECIFIED |
| 31239 | OTHER DISORDERS OF IMPULSE CONTROL |
| 3129 | UNSPECIFIED DISTURBANCE OF CONDUCT |
| 31389 | OTHER EMOTIONAL DISTURBANCES OF CHILDHOOD OR ADOLESCENCE |
| 3139 | UNSPECIFIED EMOTIONAL DISTURBANCE OF CHILDHOOD OR ADOLESCENCE |
| 316 | PSYCHIC FACTORS ASSOCIATED WITH DISEASES CLASSIFIED ELSEWHERE |
| 7801 | HALLUCINATIONS |
| 7803 | CONVULSIONS |
| 7992 | NERVOUSNESS |
| 79921 | NERVOUSNESS |
| 79922 | IRRITABILITY |
| 79925 | DEMORALIZATION AND APATHY |
| 79929 | OTHER SIGNS AND SYMPTOMS INVOLVING EMOTIONAL STATE |
| 7993 | DEBILITY, UNSPECIFIED |
| V6284 | SUICIDAL IDEATION |
| **Attention deficit disorders** | 31400 | ATTENTION DEFICIT DISORDER WITHOUT HYPERACTIVITY |
| 31401 | ATTENTION DEFICIT DISORDER WITH HYPERACTIVITY |
| 3142 | HYPERKINETIC CONDUCT DISORDER OF CHILDHOOD |
| 3149 | UNSPECIFIED HYPERKINETIC SYNDROME OF CHILDHOOD |
| V400 | MENTAL AND BEHAVIORAL PROBLEMS WITH LEARNING |
| V409 | UNSPECIFIED MENTAL OR BEHAVIORAL PROBLEM |
| **Developmental disorders** | 3152 | OTHER SPECIFIC DEVELOPMENTAL LEARNING DIFFICULTIES |
| 31531 | EXPRESSIVE LANGUAGE DISORDER |
| 31534 | SPEECH AND LANGUAGE DEVELOPMENTAL DELAY DUE TO HEARING LOSS |
| 31539 | OTHER DEVELOPMENTAL SPEECH DISORDER |
| 3154 | DEVELOPMENTAL COORDINATION DISORDER |
| 3158 | OTHER SPECIFIED DELAYS IN DEVELOPMENT |
| 3159 | UNSPECIFIED DELAY IN DEVELOPMENT |
| 317 | MILD INTELLECUTAL DISABILITIES |
| 317 | MILD MENTAL RETARDATION |
| 319 | UNSPECIFIED INTELLECTUAL DISABILITIES |
| 319 | UNSPECIFIED MENTAL RETARDATION |
| 33183 | MILD COGNITIVE IMPAIRMENT, SO STATED |
| 7834 | LACK OF EXPECTED NORMAL PHYSIOLOGICAL DEVELOPMENT |
| 7834 | LACK OF EXPECTED NORMAL PHYSIOLOGICAL DEVELOPMENT IN CHILDHOOD |
| 78340 | LACK OF NORMAL PHYSIOLOGICAL DEVELOPMENT, UNSPECIFIED |
| **Degenerative disorders** | 330 | CEREBRAL DEGENERATIONS USUALLY MANIFEST IN CHILDHOOD |
| 3300 | LEUKODYSTROPHY |
| 3308 | OTHER SPECIFIED CEREBRAL DEGENERATIONS IN CHILDHOOD |
| 3313 | COMMUNICATING HYDROCEPHALUS |
| 3313 2 | POST HEMORRHAGIC HYDROCEPHALUS |
| 3314 | OBSTRUCTIVE HYDROCEPHALUS |
| 33189 | OTHER CEREBRAL DEGENERATION |
| 3319 | CEREBRAL DEGENERATION, UNSPECIFIED |
| 3348 | OTHER SPINOCEREBELLAR DISEASES |
| 335 | ANTERIOR HORN CELL DISEASE |
| 3350 | WERDNIG-HOFFMANN DISEASE |
| 33510 | SPINAL MUSCULAR ATROPHY, UNSPECIFIED |
| 33522 | PROGRESSIVE BULBAR PALSY |
| 33523 | PSEUDOBULBAR PALSY |
| 3360 | SYRINGOMYELIA AND SYRINGOBULBIA |
| 340 | MULTIPLE SCLEROSIS |
| 3410 | NEUROMYELITIS OPTICA |
| 3411 | SCHILDER'S DISEASE |
| 34120 | ACUTE (TRANSVERSE) MYELITIS NOS |
| 3419 | DEMYELINATING DISEASE OF CENTRAL NERVOUS SYSTEM, UNSPECIFIED |
| 3480 | CEREBRAL CYSTS |
| 348891 | CEREBRAL CALCIFICATION |
| 3590 | CONGENITAL HEREDITARY MUSCULAR DYSTROPHY |
| 3591 | HEREDITARY PROGRESSIVE MUSCULAR DYSTROPHY |
| **Headache** | 30781 | TENSION HEADACHE |
| 34600 | MIGRAINE WITH AURA WITHOUT MENTION OF INTRACTABLE MIGRAINE,WITHOU T MENTION OF STATUS MIGRAINOSUS |
| 34601 | MIGRAINE WITH AURA,SO STATED,WITHOUT MENTION OF STATU.MIGRAINOSUS |
| 34620 | VARIANTS OF MIGRAINE, WITHOUT INTRACTABLE MIGRAINE |
| 34630 | HEMIPLEGIC MIGRAINE WITHOUT MENTION OF INTRACTABLE MIGRAINE, WITH OUT MENTION OF STATUS MIGRAINOSUS |
| 34670 | CHRONIC MIGRAINE WITHOUT AURA WITHOUT MENTION OF INTRACTABLE MIGR AINE, WITHOUT MENTION OF STATUS MIGRAINOSUS |
| 3469 | MIGRAINE, UNSPECIFIED |
| 34690 | MIGRAINE, UNSPECIFIED, WITHOUT INTRACTABEL MIGRAINE |
| 34690 | MIGRAINE, UNSPECIFIED, WITHOUT MENTION OF INTRACTABLE MIGRAINE WI THOUT MENTION OF STATUS MIGRAINOSUS |
| **Myopathy** | 3556 | LESION OF PLANTAR NERVE |
| 33709 | OTHER IDIOPATHIC PERIPHERAL AUTONOMIC NEUROPATHY |
| 33720 | REFLEX SYMPATHETIC DYSTROPHY, UNSPECIFIED |
| 33721 | REFLEX SYMPATHETIC DYSTROPHY OF UPPER LIMB |
| 33722 | REFLEX SYMPATHETIC DYSTROPHY OF LOWER LIMB |
| 3379 | UNSPECIFIED DISORDER OF AUTONOMIC NERVOUS SYSTEM |
| 3510 | BELL'S PALSY |
| 3518 | OTHER FACIAL NERVE DISORDERS |
| 3519 | FACIAL NERVE DISORDER, UNSPECIFIED |
| 352 | DISORDERS OF OTHER CRANIAL NERVES |
| 3539 | UNSPECIFIED NERVE ROOT AND PLEXUS DISORDER |
| 3542 | LESION OF ULNAR NERVE |
| 3548 | OTHER MONONEURITIS OF UPPER LIMB |
| 3549 | MONONEURITIS OF UPPER LIMB, UNSPECIFIED |
| 3553 | LESION OF LATERAL POPLITEAL NERVE |
| 3558 | MONONEURITIS OF LOWER LIMB, UNSPECIFIED |
| 3559 | MONONEURITIS OF UNSPECIFIED SITE |
| 3562 | HEREDITARY SENSORY NEUROPATHY |
| 3564 | IDIOPATHIC PROGRESSIVE POLYNEUROPATHY |
| 3568 | OTHER SPECIFIED IDIOPATHIC PERIPHERAL NEUROPATHY |
| 3569 | UNSPECIFIED IDIOPATHIC PERIPHERAL NEUROPATHY |
| 3570 | ACUTE INFECTIVE POLYNEURITIS |
| 3571 | POLYNEUROPATHY IN COLLAGEN VASCULAR DISEASE |
| 3572 | POLYNEUROPATHY IN DIABETES |
| 3577 | POLYNEUROPATHY DUE TO OTHER TOXIC AGENTS |
| 35781 | CHRONIC INFLAMMATORY DEMYELINATING POLYNEURITIS |
| 35800 | MYASTHENIA GRAVIS WITHOUT (ACUTE) EXACERBATION |
| 3588 | OTHER SPECIFIED MYONEURAL DISORDERS |
| 3589 | MYONEURAL DISORDERS, UNSPECIFIED |
| 3592 | MYOTONIC DISORDERS |
| 3599 | MYOPATHY, UNSPECIFIED |
| **Others** | 30789 | OTHER PSYCHALGIA |
| 33381 | BLEPHAROSPASM |
| 3384 | CHRONIC PAIN SYNDROME |
| 33903 | EPISODIC PAROXYSMAL HEMICRANIA |
| 3482 | BENIGN INTRACRANIAL HYPERTENSION |
| 3483 | ENCEPHALOPATHY, UNSPECIFIED |
| 3483 | ENCEPHALOPATHY,NOT ELSEWHERE CLASSIFIED |
| 34830 | ENCEPHALOPATHY, UNSPECIFIED |
| 34831 | METABOLIC ENCEPHALOPATHY |
| 3488 1 | CEREBRAL CALCIFICATION |
| 34881 | TEMPORAL SCLEROSIS |
| 34889 | OTHER CONDITIONS OF BRAIN |
| 3490 | REACTION TO SPINAL OR LUMBAR PUNCTURE |
| 3492 | DISORDERS OF MENINGES, NOT ELSEWHERE CLASSIFIED |
| 34981 | CEREBROSPINAL FLUID RHINORRHEA |
| 34989 | OTHER SPECIFIED DISORDERS OF NERVOUS SYSTEM |
| 3499 | UNSPECIFIED DISORDERS OF NERVOUS SYSTEM |
| 3561 | PERONEAL MUSCULAR ATROPHY |
| 7802 | SYNCOPE AND COLLAPSE |
| 78093 | MEMORY LOSS |
| 7843 | APHASIA |
| 99701 | CENTRAL NERVOUS SYSTEM COMPLICATION |
| 99709 | OTHER NERVOUS SYSTEM COMPLICATIONS |
| **Infectious morbidities** | | |
| **Urinary tract infection** | 5901 | ACUTE PYELONEPHRITIS |
|  | 5990 | URINARY TRACT INFECTION, SITE NOT SPECIFIED |
| 59010 | AC.PYELONEPHRITIS WITHOUT LESION OF RENAL MEDULLARY NECROSIS |
| 59080 | PYELONEPHRITIS, UNSPECIFIED |
| 5950 | ACUTE CYSTITIS |
| 59581 | CYSTITIS CYSTICA |
| 59589 | OTHER SPECIFIED TYPES OF CYSTITIS |
| 5959 | CYSTITIS, UNSPECIFIED |
| 5970 | URETHRAL ABSCESS |
| 59780 | URETHRITIS, UNSPECIFIED |
| 59789 | OTHER URETHRITIS |
| 5902 | RENAL AND PERINEPHRIC ABSCESS |
| **Gastrointestinal infection** | 0030 | SALMONELLA GASTROENTERITIS |
|  | 0039 | SALMONELLA INFECTION, UNSPECIFIED |
| 0040 | SHIGELLA DYSENTERIAE |
| 0041 | SHIGELLA FLEXNERI |
| 0042 | SHIGELLA BOYDII |
| 0043 | SHIGELLA SONNEI |
| 0048 | OTHER SPECIFIED SHIGELLA INFECTIONS |
| 0049 | SHIGELLOSIS, UNSPECIFIED |
| 0051 | BOTULISM |
| 0059 | FOOD POISONING, UNSPECIFIED |
| 0068 | AMEBIC INFECTION OF OTHER SITES |
| 0069 | AMEBIASIS, UNSPECIFIED |
| 0070 | BALANTIDIASIS |
| 0071 | GIARDIASIS |
| 0078 | OTHER SPECIFIED PROTOZOAL INTESTINAL DISEASES |
| 0079 | UNSPECIFIED PROTOZOAL INTESTINAL DISEASE |
| 129 | INTESTINAL PARASITISM, UNSPECIFIED |
| 008 | INTESTINAL INFECTIONS DUE TO OTHER ORGANISMS |
| 0084 | INTESTINAL INFECTION DUE TO OTHER SPECIFIED BACTERIA |
| 00842 | INTESTINAL INFEC. DUE TO PSEUDOMONAS |
| 00843 | INTESTINAL INFEC. DUE TO CAMPYLOBACTER |
| 00845 | INTESTINAL INFEC. DUE TO CLOSTRIDIUM DIFFICILE |
| 0085 | BACTERIAL ENTERITIS, UNSPECIFIED |
| 00861 | ENTERITIS DUE TO ROTAVIRUS |
| 00862 | ENTERITIS DUE TO ADENOVIRUS |
| 00865 | ENTERITIS DUE TO CALICIVIRUS |
| 00867 | ENTERITIS DUE TO ENTEROVIRUS, N.E.C. |
| 00869 | OTHER VIRAL ENTERITIS |
| 0088 | INTESTINAL INFECTION DUE TO OTHER ORGANISM,NOT ELSEW.CLASS. |
| 0090 | INFECTIOUS COLITIS, ENTERITIS, & GASTROENTERITIS |
| 0090 | INFECTIOUS COLITIS, ENTERITIS, AND GASTROENTERITIS |
| 0091 | COLITIS,ENTERITIS,GASTROENTERITIS OF PRESUMED INF. ORIGIN |
| 0092 | INFECTIOUS DIARRHEA |
| 1274 | ENTEROBIASIS |
| 1278 | MIXED INTESTINAL HELMINTHIASIS |
| 1279 | INTESTINAL HELMINTHIASIS, UNSPECIFIED |
| 1289 | HELMINTH INFECTION, UNSPECIFIED |
| 04186 | HELICOBACTER PYLORI (H. PYLORI) INFECTION |
| **Meningitis** | 0022 | PARATYPHOID FEVER B |
|  | 0023 | PARATYPHOID FEVER C |
| 320 | BACTERIAL MENINGITIS |
| 3200 | HEMOPHILUS MENINGITIS |
| 3201 | PNEUMOCOCCAL MENINGITIS |
| 3202 | STREPTOCOCCAL MENINGITIS |
| 3203 | STAPHYLOCOCCAL MENINGITIS |
| 3207 | MENINGITIS IN OTHER BACTERIAL DISEASES CLASSIFIED ELSEWHERE |
| 3208 | MENINGITIS DUE TO OTHER SPECIFIED BACTERIA |
| 32082 | MENINGITIS DUE TO GRAM-NEGATIVE |
| 32089 | MENINGITIS DUE TO OTHER SPECIFIED BACTERIA |
| 3209 | MENINGITIS DUE TO UNSPECIFIED BACTERIUM |
| 3240 | INTRACRANIAL ABSCESS |
| 3241 | INTRASPINAL ABSCESS |
| 3249 | INTRACRANIAL AND INTRASPINAL ABSCESS OF UNSPECIFIED SITE |
| 325 | PHLEBITIS AND THROMBOPHLEBITIS OF INTRACRANIAL VENOUS SINUSES |
| 326 | LATE EFFECTS OF INTRACRANIAL ABSCESS OR PYOGENIC INFECTION |
| 0360 | MENINGOCOCCAL MENINGITIS |
| 0470 | MENINGITIS DUE TO COXSACKIE VIRUS |
| 0471 | MENINGITIS DUE TO ECHO VIRUS |
| 0478 | OTHER SPECIFIED VIRAL MENINGITIS |
| 0479 | UNSPECIFIED VIRAL MENINGITIS |
| 048 | OTHER ENTEROVIRUS DISEASES OF CENTRAL NERVOUS SYSTEM |
| 0491 | NON-ARTHOPOD-BORNE MENINGITIS DUE TO ADENOVIRUS |
| 0499 | UNSP.NON-ARTHROPOD-BORNE VIRAL DIS.OF CENTRAL NERVOUS SYSTEM |
| 3236 | POSTINFECTIOUS ENCEPHALITIS |
| 32361 | INFECTIOUS ACUTE DISSEMINATED ENCEPHALOMYELITIS (ADEM) |
| 0038 | OTHER SPECIFIED SALMONELLA INFECTIONS |
| **Opportunistic infection** | 0073 | INTESTINAL TRICHOMONIASIS |
|  | 0074 | CRYPTOSPORIDIOSIS |
| 0075 | CYCLOSPORIASIS |
| 0783 | CAT-SCRATCH DISEASE |
| 0082 | INTESTINAL INFEC. DUE TO AEROBACTER AEROGENES |
| 00841 | INTESTINAL INFEC. DUE TO STAPHYLOCOCCUS |
| 0205 | PNEUMONIC PLAGUE, UNSPECIFIED |
| 0209 | PLAGUE, UNSPECIFIED |
| 022 | ANTHRAX |
| 0810 | MURINE (ENDEMIC) TYPHUS |
| 0820 | SPOTTED FEVERS |
| 0830 | Q FEVER |
| 0838 | OTHER SPECIFIED RICKETTSIOSES |
| 0839 | RICKETTSIOSIS, UNSPECIFIED |
| 0846 | MALARIA, UNSPECIFIED |
| 0859 | LEISHMANIASIS, UNSPECIFIED |
| 0879 | RELAPSING FEVER, UNSPECIFIED |
| 08881 | LYME DISEASE (ERYTHEMA CHRONICUM MIGRANS) |
| 08882 | BABESIOSIS |
| 0940 | TABES DORSALIS |
| 0980 | GONOCOCCAL INFEC.,ACUTE, OF LOWER GENITOURINARY TRACT |
| 09840 | GONOCOCCAL CONJUNCTIVITIS (NEONATORUM) |
| 09882 | GONOCOCCAL MENINGITIS |
| 09886 | GONOCOCCAL PERITONITIS |
| 1000 | LEPTOSPIROSIS ICTEROHEMORRHAGICA |
| 1229 | ECHINOCOCCOSIS, OTHER AND UNSPECIFIED |
| 1270 | ASCARIASIS |
| 1369 | UNSP. INFECTIOUS & PARASITIC DISEASES |
| 1369 | UNSPECIFIED INFECTIOUS AND PARASITIC DISEASES |
| 1160 | BLASTOMYCOSIS |
| 1173 | ASPERGILLOSIS |
| 1175 | CRYPTOCOCCOSIS |
| 1177 | ZYGOMYCOSIS (PHYCOMYCOSIS OR MUCORMYCOSIS) |
| 1179 | OTHER AND UNSPECIFIED MYCOSES |
| 1209 | SCHISTOSOMIASIS, UNSPECIFIED |
| 1225 | ECHINOCOCCUS MULTILOCULARIS INFECTION OF LIVER |
| 1228 | ECHINOCOCCOSIS, UNSPECIFIED, OF LIVER |
| **Brucellosis** | 0239 | BRUCELLOSIS, UNSPECIFIED |
|  | 0269 | UNSPECIFIED RAT-BITE FEVER |
| 0270 | LISTERIOSIS |
| 0312 | DISSEMINATED DISEASE DUE TO OTHER MYCOBACTERIA |
| 0319 | UNSPECIFIED DISEASES DUE TO MYCOBACTERIA |
| 03283 | DIPHTHERITIC PERITONITIS |
| **Nosocomial infection** | 0418 | OTHER SPEC.BACTERIAL INF;IN CONDIT.CLASS.ELSEWHERE,UNSP.SITE |
|  | 04189 | OTHER SPECIFIED BACTERIA INFECTION |
| 0419 | UNSP. BACTERIAL INFECTION, UNSP. SITE |
| 0419 | UNSPEC.BACTERIAL INF;IN CONDIT. CLASSIF.ELSEWHERE,UNSP.SITE |
| **Pertussis** | 0330 | WHOOPING COUGH DUE TO BORDETELLA PERTUSSIS (B. PERTUSSIS) |
|  | 0331 | WHOOPING COUGH DUE TO BORDETELLA PARAPERTUSSIS |
| 0339 | WHOOPING COUGH, UNSPECIFIED ORGANISM |
| **Strepto-/Staphylo-coccus infection** | 034 | STREPTOCOCCAL SORE THROAT AND SCARLET FEVER |
|  | 0340 | STREPTOCOCCAL SORE THROAT |
| 0341 | SCARLET FEVER |
| 035 | ERYSIPELAS |
| 0410 | STREPTOCOCCUS INFECT.IN CONDITION CLASSIF.ELSEWHERE;UNSP.SITE |
| 04100 | STREPTOCOCCUS INFEC., UNSP. |
| 04101 | STREPTOCOCCUS INFEC., GROUP A |
| 04101 | STREPTOCOCCUS INFEC., GROUP A (ADDITIONAL CODE) |
| 04102 | STREPTOCOCCUS INFEC., GROUP B |
| 04103 | STREPTOCOCCUS INFEC., GROUP C |
| 04104 | STREPTOCOCCUS INFEC., GROUP D (ENTEROCOCCUS) |
| 04105 | STREPTOCOCCUS INFEC., GROUP G |
| 04109 | OTHER STREPTOCOCCUS INFEC. |
| 0411 | STAPHYLOCOCCUS INFECT.IN CONDIT.CLASSIF.ELSEWHERE,UNSP.SITE |
| 0411 | STAPHYLOCOCCUS INFECTION, UNSP. SITE |
| 04110 | STAPHYLOCOCCUS INFECTION, UNSP. |
| 04111 | METHICILLIN SUSCEPTIBLE STAPHYLOCOCCUS AUREUS |
| 04111 | STAPHYLOCOCCUS AUREUS INFEC. |
| 04111 | STAPHYLOCOCCUS AUREUS INFEC. (ADDITIONAL CODE) |
| 04112 | METHICILLIN RESISTANT STAPHYLOCOCCUS AUREUS |
| 04119 | OTHER STAPHYLOCOCCUS INFECTION |
| 0412 | PNEUMOCOCCUS INFECT.IN CONDITION CLASSIF.ELSEWHERE;UNSP.SITE |
| 0412 | PNEUMOCOCCUS INFECTION, UNSP. SITE |
| **Sepsis** | 0380 | STREPTOCOCCAL SEPTICEMIA |
|  | 0381 | STAPHYLOCOCCAL SEPTICEMIA |
| 03810 | STAPHYLOCOCCAL SPETICEMIA, UNSP. |
| 03811 | METHICILLIN SUSCEPTIBLE STAPHYLOCOCCUS AUREUS SEPTICEMIA |
| 03811 | STAPHYLOCOCCUS AUREUS SEPTICEMIA |
| 03812 | METHICILLIN RESISTANT STAPHYLOCOCCUS AUREUS SEPTICEMIA |
| 03819 | OTHER STAPHYLOCOCCAL SEPTICEMIA |
| 0382 | PNEUMOCOCCAL SEPTICEMIA |
| 0383 | SEPTICEMIA DUE TO ANAEROBES |
| 03840 | SEPTICEMIA DUE TO GRAM-NEGATIVE ORGANISM, UNSPECIFIED |
| 03841 | SEPTICEMIA DUE TO HEMOPHILUS INFLUENZAE (H. INFLUENZAE) |
| 03842 | SEPTICEMIA DUE TO ESCHERICHIA COLI (E. COLI) |
| 03843 | SEPTICEMIA DUE TO PSEUDOMONAS |
| 03849 | OTHER SEPTICEMIA DUE TO GRAM-NEGATIVE ORGANISMS |
| 038491 | KLEBSIELLA SEPTICEMIA |
| 0388 | OTHER SPECIFIED SEPTICEMIAS |
| 0388 1 | CANDIDA SEPTICEMIA |
| 0388 2 | ENTEROCOCCUS SEPTICEMIA |
| 0388 3 | ACITINOBACTER SEPTICEMIA |
| 0389 | UNSPECIFIED SEPTICEMIA |
| 99591 | SEPSIS |
| 99591 | SYSTEMIC INFLAMMATORY RESPONSE SYNDROME DUE TO INFECTIOUS PROCESS WITHOUT ORGAN DYSFUNCTION |
| 99592 | SEVERE SEPSIS |
| 99592 | SYSTEMIC INFLAMMATORY RESPONSE SYNDROME DUE TO INFECTIOUS PROCESS WITH ORGAN DYSFUNCTION |
| V091 | INFECTION WITH MICROORGAN. RESISTANT TO CEPHALOSPORINS/B-LACTAM ANTIBIOTICS |
| V0980 | INFECTION WITH MICROORGAN. RESISTANT TO OTHER SPEC. DRUGS, WITHOUT MENTION OF RESISTANCE TO MULTIPLE DRUGS |
| V0991 | INFECTION WITH DRUG-RESISTANT MICROORGAN.,UNSPEC. DRUG RESISTANCE NOS, WITH MULTIPLE DRUG RESISTANCE |
| **Gram-negative infection** | 0413 | FRIEDLANDER'S BACILLUS, UNSP. SITE |
|  | 0413 | FRIEDLANDER'S BACILLUS;CONDITION CLASSIF.ELSEWHERE,UNSP.SITE |
| 0413 | KLEBSIELLA PNEUMONIAE |
| 0414 | ESCHERICHIA COLI (E. COLI), UNSP. SITE |
| 0414 | ESCHERICHIA COLI (E. COLI), UNSP. SITE (ADDITIONAL CODE) |
| 0414 | ESCHERICHIA COLI(E. COLI),CONDITI.CLASSIF.ELSEWHERE,UNSP.SITE |
| 0415 | HEMOPHILUS INFLUENZAE IN CONDIT.CLASSIF.ELSEWHERE,UNSP.SITE |
| 0415 | HEMOPHILUS INFLUENZAE, UNSP. SITE (H.INFLUENZAE) |
| 0416 | PROTEUS (MIRABILIS,MORGANII), UNSP. SITE |
| 0416 | PROTEUS(MIRABILIS,MORGANII)CONDIT,CLASSIF.ELSEWHERE,UNSP.SITE |
| 0417 | PSEUDOMONAS INFEC., UNSP. SITE |
| 0417 | PSEUDOMONAS INFECT.IN CONDIT.CLASSIF.ELSEWHERE,UNSPEC.SITE |
| 04185 | OTHER GRAM-NEGATIVE ORGANISMS INFECTION |
| **Viral infection** | 0521 | VARICELLA (HEMORRHAGIC) PNEUMONITIS |
|  | 0527 | CHICKENPOX WITH OTHER SPECIFIED COMPLICATIONS |
| 0528 | CHICKENPOX WITH UNSPECIFIED COMPLICATION |
| 0529 | VARICELLA WITHOUT MENTION OF COMPLICATION |
| 0540 | ECZEMA HERPETICUM |
| 05410 | GENITAL HERPES, UNSPECIFIED |
| 0542 | HERPETIC GINGIVOSTOMATITIS |
| 0543 | HERPETIC MENINGOENCEPHALITIS |
| 05440 | HERPES SIMPLEX + UNSP. OPHTHALMIC COMPLICATION |
| 05441 | HERPES SIMPLEX DERMATITIS OF EYELID |
| 05443 | HERPES SIMPLEX DISCIFORM KERATITIS |
| 05449 | HERPES SIMPLEX WITH OTHER OPHTHALMIC COMPLICATIONS |
| 0546 | HERPETIC WHITLOW |
| 05472 | HERPES SIMPLEX MENINGITIS |
| 05479 | HERPES SIMPLEX + OTHER SPEC. COMPLICATIONS |
| 0549 | HERPES SIMPLEX WITHOUT MENTION OF COMPLICATION |
| 05829 | OTHER HUMAN HERPESVIRUS ENCEPHALITIS |
| 05311 | GENICULATE HERPES ZOSTER |
| 05319 | HERPES ZOSTER + OTHER NERVOUS SYSTEM COMPLICATIONS |
| 05320 | HERPES ZOSTER DERMATITIS OF EYELID |
| 05329 | HERPES ZOSTER + OTHER OPHTHALMIC COMPLICATIONS |
| 0539 | HERPES ZOSTER WITHOUT MENTION OF COMPLICATION |
| 0559 | MEASLES WITHOUT MENTION OF COMPLICATION |
| 0569 | RUBELLA WITHOUT MENTION OF COMPLICATION |
| 0570 | ERYTHEMA INFECTIOSUM (FIFTH DISEASE) |
| 0578 | OTHER SPECIFIED VIRAL EXANTHEMATA |
| 0579 | VIRAL EXANTHEM, UNSPECIFIED |
| 05810 | ROSEOLA INFANTUM, UNSPECIFIED |
| 075 | INFECTIOUS MONONUCLEOSIS |
| 0785 | CYTOMEGALIC INCLUSION DISEASE |
| 0785 | CYTOMEGALOVIRAL DISEASE |
| 0773 | OTHER ADENOVIRAL CONJUNCTIVITIS |
| 0774 | EPIDEMIC HEMORRHAGIC CONJUNCTIVITIS |
| 0779 | UNSPEC.DISEASES OF CONJUNCTIVA DUE TO VIRUSES AND CHLAMYDIAE |
| 07799 | UNSP. DIS. OF CONJUNCTIVA DUE TO VIRUSES |
| 0784 | FOOT AND MOUTH DISEASE |
| 0796 | RESPIRATORY SYNCYTIAL VIRUS (RSV) |
| 06641 | WEST NILE FEVER WITH ENCEPHALITIS |
| 0723 | MUMPS PANCREATITIS |
| 0740 | HERPANGINA |
| 0743 | HAND, FOOT, AND MOUTH DISEASE |
| **Hepatitis** | 0701 | VIRAL HEPATITIS A WITHOUT HEPATIC COMA |
|  | 0701 | VIRAL HEPATITIS A WITHOUT MENTION OF HEPATIC COMA |
| 07030 | VIRAL HEPATITIS B WITHOUT HEPATIC COMA & HEPATITIS DELTA -92 |
| 07030 | VIRAL HEPATITIS B WITHOUT HEPATIC COMA,AC/UNSP.WITHOUT HEP. DELTA |
| 07032 | VIRAL HEPATITS B WITHOUT HEPATIC COMA,CHR. WITHOUT HEPATITIS DELT |
| 0709 | UNSP. VIRAL HEPATITIS WITHOUT HEPATIC COMA |
| 0709 | UNSPECIFIED VIRAL HEPATITIS WITHOUT MENTION OF HEPATIC COMA |
| **Warts** | 0780 | MOLLUSCUM CONTAGIOSUM |
|  | 0781 | VIRAL WARTS |
| 07810 | VIRAL WARTS, UNSPECIFIED |
| 07811 | CONDYLOMA ACUMINATUM |
| 07812 | PLANTAR WART |
| 07819 | OTHER SPECIFIED VIRAL WARTS |
| 07889 | OTHER SPECIFIED DISEASES DUE TO VIRUSES |
| 07889 | OTHER SPECIFIED DISEASES DUE TO VIRUSES AND CHLAMYDIAE |
| **Nosocomial viral infection** | 0790 | ADENOVIRUS INF.IN CONDITIONS CLASSIF.ELSEWHERE,UNSP.SITE |
|  | 0790 | ADENOVIRUS INFECTION, UNSP. SITE |
| 0791 | ECHO VIRUS INFECTION, UNSP. SITE |
| 0792 | COXSACKIE VIRUS INFECTION, UNSP. SITE |
| 0793 | RHINOVIRUS INFECTION, UNSP. SITE |
| 07950 | RETROVIRUS, UNSP.,UNSP. SITE |
| 07959 | OTHER SPECIFIED RETROVIRUS |
| 0798 | OTHER SPECIFIED VIRAL INFECTION CLASSIF.ELSEWHERE,UNSP.SITE |
| 07989 | OTHER SPEC. VIRAL INFECTION |
| 0799 | UNSP. VIRAL & CHLANYDIAL INFECTION |
| 0799 | UNSP.VIRAL INFECT.IN CONDITIONS CLASSIF.ELSEWHERE,UNSP.SITE |
| 07999 | UNSP. VIRAL INFECTION |
| 07999 | UNSP. VIRAL INFECTION (ADDITIONAL CODE) |
| **Fungal infection** | 1100 | DERMATOPHYTOSIS OF SCALP AND BEARD |
|  | 1101 | DERMATOPHYTOSIS OF NAIL |
| 1103 | DERMATOPHYTOSIS OF GROIN AND PERIANAL AREA |
| 1104 | DERMATOPHYTOSIS OF FOOT |
| 1105 | DERMATOPHYTOSIS OF THE BODY |
| 1109 | DERMATOPHYTOSIS OF UNSPECIFIED SITE |
| 1110 | PITYRIASIS VERSICOLOR |
| 1118 | OTHER SPECIFIED DERMATOMYCOSES |
| 1119 | DERMATOMYCOSIS, UNSPECIFIED |
| 1120 | CANDIDIASIS OF MOUTH |
| 1121 | CANDIDIASIS OF VULVA AND VAGINA |
| 1124 | CANDIDIASIS OF LUNG |
| 1123 | CANDIDIASIS OF SKIN AND NAILS |
| 11282 | CANDIDAL OTITIS EXTERNA |
| 11284 | CANDIDAL ESOPHAGITIS |
| 11289 | OTHER CANDIDIASIS OF OTHER SPECIFIED SITES |
| 1129 | CANDIDIASIS OF UNSPECIFIED SITE |
| 11281 | CANDIDAL ENDOCARDITIS |
| **Otitis** | 38001 | ACUTE PERICHONDRITIS OF PINNA |
|  | 38002 | CHRONIC PERICHONDRITIS OF PINNA |
| 38003 | CHONDRITIS OF PINNA |
| 38010 | INFECTIVE OTITIS EXTERNA, UNSPECIFIED |
| 38015 | CHRONIC MYCOTIC OTITIS EXTERNA |
| 38022 | OTHER ACUTE OTITIS EXTERNA |
| 38023 | OTHER CHRONIC OTITIS EXTERNA |
| 38100 | ACUTE NONSUPPURATIVE OTITIS MEDIA, UNSPECIFIED |
| 38101 | ACUTE SEROUS OTITIS MEDIA |
| 38104 | ACUTE ALLERGIC SEROUS OTITIS MEDIA |
| 38110 | CHRONIC SEROUS OTITIS MEDIA, SIMPLE OR UNSPECIFIED |
| 38119 | OTHER CHRONIC SEROUS OTITIS MEDIA |
| 38129 | OTHER CHRONIC MUCOID OTITIS MEDIA |
| 3813 | OTHER AND UNSPECIFIED CHRONIC NONSUPPURATIVE OTITIS MEDIA |
| 3814 | NONSUPPURATIVE OTITIS MEDIA, NOT SPECIFIED AS ACUTE OR CHRONIC |
| 382 | SUPPURATIVE AND UNSPECIFIED OTITIS MEDIA |
| 3820 | ACUTE SUPPURATIVE OTITIS MEDIA |
| 38200 | AC.SUPPURAT.OTITIS MEDIA WITHOUT SPONTAN.RUPTURE OF EARDRUM |
| 38201 | ACUTE SUPPURAT.OTITIS MEDIA WITH SPONTAN.RUPTURE OF EARDRUM |
| 3821 | CHRONIC TUBOTYMPANIC SUPPURATIVE OTITIS MEDIA |
| 3823 | UNSPECIFIED CHRONIC SUPPURATIVE OTITIS MEDIA |
| 3824 | UNSPECIFIED SUPPURATIVE OTITIS MEDIA |
| 3829 | UNSPECIFIED OTITIS MEDIA |
| 38300 | ACUTE MASTOIDITIS WITHOUT COMPLICATIONS |
| 38301 | SUBPERIOSTEAL ABSCESS OF MASTOID |
| 3831 | CHRONIC MASTOIDITIS |
| 38330 | POSTMASTOIDECTOMY COMPLICATION, UNSPECIFIED |
| 3839 | UNSPECIFIED MASTOIDITIS |
| 38400 | ACUTE MYRINGITIS, UNSPECIFIED |
| 38401 | BULLOUS MYRINGITIS |
| 38530 | CHOLESTEATOMA, UNSPECIFIED |
| 38531 | CHOLESTEATOMA OF ATTIC |
| 38532 | CHOLESTEATOMA OF MIDDLE EAR |
| **Upper respiratory infection** | 460 | ACUTE NASOPHARYNGITIS (COMMON COLD) |
|  | 4610 | ACUTE MAXILLARY SINUSITIS |
| 4611 | ACUTE FRONTAL SINUSITIS |
| 4612 | ACUTE ETHMOIDAL SINUSITIS |
| 4613 | ACUTE SPHENOIDAL SINUSITIS |
| 4618 | OTHER ACUTE SINUSITIS |
| 4619 | ACUTE SINUSITIS, UNSPECIFIED |
| 462 | ACUTE PHARYNGITIS |
| 463 | ACUTE TONSILLITIS |
| 464 | ACUTE LARYNGITIS AND TRACHEITIS |
| 4640 | ACUTE LARYNGITIS |
| 46400 | ACUTE LARYNGITIS WITHOUT MENTION OF OBSTRUCTION |
| 46410 | ACUTE TRACHEITIS WITHOUT MENTION OF OBSTRUCTION |
| 46420 | ACUTE LARYNGOTRACHEITIS WITHOUT MENTION OF OBSTRUCTION |
| 46430 | ACUTE EPIGLOTTITIS WITHOUT MENTION OF OBSTRUCTION |
| 4644 | CROUP |
| 46450 | SUPRAGLOTTITIS WITHOUT MENTION OF OBSTRUCTION |
| 465 | ACUTE UPPER RESPIRATORY INFECTIONS OF MULTIPLE OR UNSP.SITES |
| 4650 | ACUTE LARYNGOPHARYNGITIS |
| 4658 | ACUTE UPPER RESPIRATORY INFECTIONS OF OTHER MULTIPLE SITES |
| 4659 | ACUTE UPPER RESPIRATORY INFECTIONS OF UNSPECIFIED SITE |
| 4720 | CHRONIC RHINITIS |
| 4730 | CHRONIC MAXILLARY SINUSITIS |
| 4731 | CHRONIC FRONTAL SINUSITIS |
| 4732 | CHRONIC ETHMOIDAL SINUSITIS |
| 4733 | CHRONIC SPHENOIDAL SINUSITIS |
| 4738 | OTHER CHRONIC SINUSITIS |
| 4739 | UNSPECIFIED SINUSITIS (CHRONIC) |
| 475 | PERITONSILLAR ABSCESS |
| 47822 | PARAPHARYNGEAL ABSCESS |
| 47824 | RETROPHARYNGEAL ABSCESS |
| 4870 | INFLUENZA WITH PNEUMONIA |
| 4871 | INFLUENZA WITH OTHER RESPIRATORY MANIFESTATIONS |
| 4878 | INFLUENZA WITH OTHER MANIFESTATIONS |
| 4880 | INFLUENZA DUE TO IDENTIFIED AVIAN INFLUENZA VIRUS |
| 4881 | INFLUENZA DUE TO IDENTIFIED NOVEL H1N1 INFLUENZA VIRUS |
| **Bronchiolitis** | 466 | ACUTE BRONCHITIS AND BRONCHIOLITIS |
|  | 4660 | ACUTE BRONCHITIS |
| 4661 | ACUTE BRONCHIOLITIS |
| 46611 | AC. BRONCHIOLITIS DUE TO RESPIRATORY SYNCYTIAL VIRUS (RSV) |
| 46619 | AC. BRONCHIOLITIS DUE TO OTHER INFECTIOUS ORGANISMS |
| 490 | BRONCHITIS, NOT SPECIFIED AS ACUTE OR CHRONIC |
| 49121 | OBSTRUCTIVE CHR. BRONCHITIS WITH(ACUTE)EXACERBATION |
| **Pneumonia** | 480 | VIRAL PNEUMONIA |
|  | 4800 | PNEUMONIA DUE TO ADENOVIRUS |
| 4801 | PNEUMONIA DUE TO RESPIRATORY SYNCYTIAL VIRUS |
| 4802 | PNEUMONIA DUE TO PARAINFLUENZA VIRUS |
| 4808 | PNEUMONIA DUE TO OTHER VIRUS NOT ELSEWHERE CLASSIFIED |
| 4809 | VIRAL PNEUMONIA, UNSPECIFIED |
| 4841 | PNEUMONIA IN CYTOMEGALIC INCLUSION DISEASE |
| 481 | PNEUMOCOCCAL PNEUMONIA |
| 4820 | PNEUMONIA DUE TO KLEBSIELLA PNEUMONIAE |
| 4821 | PNEUMONIA DUE TO PSEUDOMONAS |
| 4822 | PNEUMONIA DUE TO HEMOPHILUS INFLUENZAE (H. INFLUENZAE) |
| 4823 | PNEUMONIA DUE TO STREPTOCOCCUS |
| 48230 | PNEUMONIA DUE TO STREPTOCOCCUS, UNSPECIFIED |
| 48231 | PNEUMONIA DUE TO STREPTOCOCCUS, GROUP A |
| 48241 | PNEUMONIA DUE TO STAPHYLOCOCCUS AUREUS |
| 4829 | BACTERIAL PNEUMONIA, UNSPECIFIED |
| 483 | PNEUMONIA DUE TO OTHER SPECIFIED ORGANISM |
| 4830 | PNEUMONIA DUE TO MYCOPLASMA PNEUMONIAE |
| 4831 | PNEUMONIA DEU TO CHLAMYDIA |
| 4838 | PNEUMONIA DUE TO OTHER SPECIFIED ORGANISM |
| 485 | BRONCHOPNEUMONIA, ORGANISM UNSPECIFIED |
| 486 | PNEUMONIA, ORGANISM UNSPECIFIED |
| 5100 | EMPYEMA WITH FISTULA |
| 5109 | EMPYEMA WITHOUT MENTION OF FISTULA |
| 7700 | CONGENITAL PNEUMONIA |
| 7701 2 | PNEUMONIA DUE TO MECONIUM ASPIRATION |
| **Ophthalmologic infection** | 36000 | PURULENT ENDOPHTHALMITIS, UNSPECIFIED |
|  | 370 | KERATITIS |
| 37040 | KERATOCONJUNCTIVITIS, UNSPECIFIED |
| 37049 | OTHER KERATOCONJUNCTIVITIS |
| 37055 | CORNEAL ABSCESS |
| 37059 | OTHER INTERSTITIAL AND DEEP KERATITIS |
| 3720 | ACUTE CONJUNCTIVITIS |
| 37200 | ACUTE CONJUNCTIVITIS, UNSPECIFIED |
| 37202 | ACUTE FOLLICULAR CONJUNCTIVITIS |
| 37203 | OTHER MUCOPURULENT CONJUNCTIVITIS |
| 37230 | CONJUNCTIVITIS, UNSPECIFIED |
| 37300 | BLEPHARITIS, UNSPECIFIED |
| 37313 | ABSCESS OF EYELID |
| 37601 | ORBITAL CELLULITIS |
| **Dermatologic infection** | 376010 | PERIORBITAL CELLULITIS |
|  | 6800 | CARBUNCLE AND FURUNCLE OF FACE |
| 6801 | CARBUNCLE AND FURUNCLE OF NECK |
| 6805 | CARBUNCLE AND FURUNCLE OF BUTTOCK |
| 6806 | CARBUNCLE AND FURUNCLE OF LEG, EXCEPT FOOT |
| 6809 | CARBUNCLE AND FURUNCLE OF UNSPECIFIED SITE |
| 68100 | UNSPECIFIED CELLULITIS AND ABSCESS OF FINGER |
| 6819 | CELLULITIS AND ABSCESS OF UNSPECIFIED DIGIT |
| 6820 | CELLULITIS AND ABSCESS OF FACE |
| 6821 | CELLULITIS AND ABSCESS OF NECK |
| 6822 | CELLULITIS AND ABSCESS OF TRUNK |
| 6823 | CELLULITIS AND ABSCESS OF UPPER ARM AND FOREARM |
| 6824 | CELLULITIS AND ABSCESS OF HAND, EXCEPT FINGERS AND THUMB |
| 6825 | CELLULITIS AND ABSCESS OF BUTTOCK |
| 6826 | CELLULITIS AND ABSCESS OF LEG, EXCEPT FOOT |
| 6827 | CELLULITIS AND ABSCESS OF FOOT, EXCEPT TOES |
| 6828 | CELLULITIS AND ABSCESS OF OTHER SPECIFIED SITES |
| 6828 1 | ABSCESS OF SCALP |
| 6829 | CELLULITIS AND ABSCESS OF UNSPECIFIED SITES |
| 684 | IMPETIGO |
| 6850 | PILONIDAL CYST WITH ABSCESS |
| 6851 | PILONIDAL CYST WITHOUT MENTION OF ABSCESS |
| 68600 | PYODERMA, UNSP. |
| 68609 | OTHER PYODERMA |
| **Orthopedic infection** | 7110 | PYOGENIC ARTHRITIS |
|  | 71100 | PYOGENIC ARTHRITIS, SITE UNSPECIFIED |
| 71101 | PYOGENIC ARTHRITIS INVOLVING SHOULDER REGION |
| 71103 | PYOGENIC ARTHRITIS INVOLVING FOREARM |
| 71104 | PYOGENIC ARTHRITIS INVOLVING HAND |
| 71105 | PYOGENIC ARTHRITIS INVOLVING PELVIC REGION AND THIGH |
| 71106 | PYOGENIC ARTHRITIS INVOLVING LOWER LEG (INCL.KNEE) |
| 71107 | PYOGENIC ARTHRITIS INVOLVING ANKLE AND FOOT |
| 71109 | PYOGENIC ARTHRITIS INVOLVING MULTIPLE SITES |
| 71141 | ARTHROPATHY SHOULDER REGION,WITH OTHER BACTERIAL DISEASES |
| 71145 | ARTHROPATHY PELVIC REGION/THIGH,WITH OTHER BACTERIAL DISEASES |
| 71146 | ARTHROPATHY LOWER LEG(INCL.KNEE)WITH OTHER BACTERIAL DISEASES |
| 71148 | ARTHROPATHY OTHER SPECIF.SITES,WITH OTHER BACTERIAL DISEASES |
| 71156 | ARTHROPATHY LOWER LEG (INCL.KNEE) WITH OTHER VIRAL DISEASES |
| 71191 | UNSPECIFIED INFECTIVE ARTHRITIS INVOLVING SHOULDER REGION |
| 72886 | NECROTIZING FASCIITIS |
| 73000 | ACUTE OSTEOMYELITIS, SITE UNSPECIFIED |
| 73001 | ACUTE OSTEOMYELITIS INVOLVING SHOULDER REGION |
| 73003 | ACUTE OSTEOMYELITIS INVOLVING FOREARM |
| 73004 | ACUTE OSTEOMYELITIS INVOLVING HAND |
| 73005 | ACUTE OSTEOMYELITIS INVOLVING PELVIC REGION AND THIGH |
| 73006 | ACUTE OSTEOMYELITIS INVOLVING LOWER LEG |
| 73007 | ACUTE OSTEOMYELITIS INVOLVING ANKLE AND FOOT |
| 73008 | ACUTE OSTEOMYELITIS INVOLVING OTHER SPECIFIED SITES |
| 7301 | CHRONIC OSTEOMYELITIS |
| 73010 | CHRONIC OSTEOMYELITIS, SITE UNSPECIFIED |
| 73011 | CHRONIC OSTEOMYELITIS INVOLVING SHOULDER REGION |
| 73012 | CHRONIC OSTEOMYELITIS INVOLVING UPPER ARM |
| 73013 | CHRONIC OSTEOMYELITIS INVOLVING FOREARM |
| 73014 | CHRONIC OSTEOMYELITIS INVOLVING HAND |
| 73015 | CHRONIC OSTEOMYELITIS INVOLVING PELVIC REGION AND THIGH |
| 73016 | CHRONIC OSTEOMYELITIS INVOLVING LOWER LEG |
| 73017 | CHRONIC OSTEOMYELITIS INVOLVING ANKLE AND FOOT |
| 73018 | CHRONIC OSTEOMYELITIS INVOLVING OTHER SPECIFIED SITES |
| 73019 | CHRONIC OSTEOMYELITIS INVOLVING MULTIPLE SITES |
| 7302 | UNSPECIFIED OSTEOMYELITIS |
| 73020 | UNSPECIFIED OSTEOMYELITIS, SITE UNSPECIFIED |
| 73021 | UNSPECIFIED OSTEOMYELITIS INVOLVING SHOULDER REGION |
| 73022 | UNSPECIFIED OSTEOMYELITIS INVOLVING UPPER ARM |
| 73023 | UNSPECIFIED OSTEOMYELITIS INVOLVING FOREARM |
| 73024 | UNSPECIFIED OSTEOMYELITIS INVOLVING HAND |
| 73025 | UNSPECIFIED OSTEOMYELITIS INVOLVING PELVIC REGION AND THIGH |
| 73026 | UNSPECIFIED OSTEOMYELITIS INVOLVING LOWER LEG |
| 73027 | UNSPECIFIED OSTEOMYELITIS INVOLVING ANKLE AND FOOT |
| 73028 | UNSPECIFIED OSTEOMYELITIS INVOLVING OTHER SPECIFIED SITES |
| 73029 | UNSPECIFIED OSTEOMYELITIS INVOLVING MULTIPLE SITES |
| 73089 | INFECT.INVOLV.BONE OF MULT.SITES,IN DISEASES CLASSIF.ELSEWHERE |
| **Others** | V08 | ASYMPTOMATIC H.I.V INFECTION STATUS |
|  | 7907 | BACTEREMIA |
| 0400 | GAS GANGRENE |
| 04082 | TOXIC SHOCK SYNDROME |
| 0630 | RUSSIAN SPRING-SUMMER (TAIGA) ENCEPHALITIS |
| 07988 | OTHER SPEC. CHLAMYDIAL INFECTION |
| 07998 | UNSP. CHLAMYDIAL INFECTION |
| 0990 | CHANCROID |
| 101 | VINCENT'S ANGINA |
| 1236 | HYMENOLEPIASIS |
| 5130 | ABSCESS OF LUNG |
| 01090 | PRIM. TB. INFEC., UNSP.TYPE, UNSP.EXAMINATION |
| 01120 | TB. OF LUNG + CAVITATION, UNSP. EXAMINATION |
| 0119 | UNSPECIFIED PULMONARY TUBERCULOSIS |
| 01190 | UNSP. PULMONARY TB., UNSP. EXAMINATION |
| 01194 | UNSP. PULMONARY TB., FOUND BY BACTERIAL CULTURE |
| 01304 | TB. MENINGITIS, FOUND BY BACTERIAL CULTURE |
| 01311 | TUBERCULOMA OF MENINGES, BACT/HISTOL. EXAM. NOT DONE |
| 01394 | UNSP. TB. OF C.N.S. FOUND BY BACTERIAL CULTURE |
| 01404 | TB. PERITONITIS, FOUND BY BACTERIAL CULTURE |
| 01485 | OTHER TB. INTESTINES, CONFIRMED HISTOLOGICALLY |
| 0362 | MENINGOCOCCEMIA |
| 03682 | MENINGOCOCCAL ARTHROPATHY |
| 03689 | OTHER SPECIFIED MENINGOCOCCAL INFECTIONS |
| 0369 | MENINGOCOCCAL INFECTION, UNSPECIFIED |
| 042 | HUMAN IMMUNODEFIC. VIRUS (HIV) DIS. /AIDS |
| 41512 | SEPTIC PULMONARY EMBOLISM |
| 42090 | ACUTE PERICARDITIS, UNSPECIFIED |
| 42099 | OTHER ACUTE PERICARDITIS |
| 4210 | ACUTE AND SUBACUTE BACTERIAL ENDOCARDITIS |
| 4211 | ACUTE + SUBACUTE INFEC.ENDOCARDITIS IN DIS.CLASS.ELSEWHERE |
| 42290 | ACUTE MYOCARDITIS, UNSPECIFIED |
| 42291 | IDIOPATHIC MYOCARDITIS |
| 42292 | SEPTIC MYOCARDITIS |
| 4290 | MYOCARDITIS, UNSPECIFIED |
| 771 | INFECTIONS SPECIFIC TO THE PERINATAL PERIOD |
| 7711 | CONGENITAL CYTOMEGALOVIRUS INFECTION |
| 7712 | OTHER CONGENITAL INFECTIONS SPECIFIC TO THE PERINATAL PERIOD |
| 7716 | NEONATAL CONJUNCTIVITIS AND DACRYOCYSTITIS |
| 7717 | NEONATAL CANDIDA INFECTION |
| 7718 | OTHER TYPE OF INFECTION SPECIFIC TO THE PERINATAL PERIOD |
| 7718 0 | SEPTICEMIA (SEPSIS) OF NEWBORN |
| 7718 1 | NEONATAL URINARY TRACT INFECTION |
| 7718 2 | NEONATAL SEPSIS WORK UP |
| 77181 | SEPTICEMIA (SEPSIS) OF NEWBORN |
| 77182 | URINARY TRACT INFECTION OF NEWBORN |
| 77183 | BACTEREMIA OF NEWBORN |
| 7775 | NECROTIZING ENTEROCOLITIS IN FETUS OR NEWBORN |
| 77750 | NECROTIZING ENTEROCOLITIS IN NEWBORN, UNSPECIFIED |
| 77753 | STAGE III NECROTIZING ENTEROCOLITIS IN NEWBORN |
| 6019 | PROSTATITIS, UNSPECIFIED |
| 6040 | ORCHITIS, EPIDIDYMITIS, AND EPIDIDYMO-ORCHITIS, WITH ABSCESS |
| 60490 | ORCHITIS AND EPIDIDYMITIS, UNSPECIFIED |
| 60491 | ORCHITIS AND EPIDIDYMITIS IN DISEASES CLASSIFIED ELSEWHERE |
| 60499 | OTHER ORCHITIS,EPIDIDYMITIS,EPIDIDYMO-ORCHIT. WITHOUT ABSCESS |
| 61610 | VAGINITIS AND VULVOVAGINITIS, UNSPECIFIED |
| 6162 | CYST OF BARTHOLIN'S GLAND |
| 6163 | ABSCESS OF BARTHOLIN'S GLAND |
| 6164 | OTHER ABSCESS OF VULVA |
| 64660 | INFECTIONS OF GENITOURINARY TRACT IN PREGN.,UNSP.EPISODE |
| 64662 | INFECT.OF GENITOURINARY TR.IN PREGN.,WITH DELIV.,WITH POSTP.COMPL. |
| 64663 | ANTEPARTUM INFECTIONS OF GENITOURINARY TRACT |
| 64664 | POSTPARTUM INFECTIONS OF GENITOURINARY TRACT |
